# Supplementary material for: Highly enhanced discharged energy density of polymer nanocomposites via a novel hybrid structure as fillers
Source: Royal Society of Chemistry journal article supplement (doi:10.1039/c9ta03292d), 2019-01-01
Supplement: c9ta03292d1.pdf [file c9ta03292d1.pdf]

## Supporting Information

### **Highly boosted discharged energy density of polymer nanocomposites via novel hybrid structure as fillers**

Zhongbin Pan<sup>\*a</sup>, Shuang Xing<sup>a</sup>, Haitao Jiang<sup>c</sup>, Jinjun Liu<sup>\*a</sup>, Shuangwu Huang<sup>a</sup>, and Jiwei Zhai<sup>\*b</sup>

<sup>a</sup>School of Materials Science and Chemical Engineering, Ningbo University, Ningbo, Zhejiang, 315211, China.

<sup>b</sup>School of Materials Science & Engineering, Tongji University, 4800 Caoan Road, Shanghai 201804, China.

<sup>c</sup>College of Science, Donghua University, Shanghai 201620, China.

\*E-mail: [panzhongbin@163.com](mailto:panzhongbin@163.com) (Zhongbin Pan), [apzhai@tongji.edu.cn](mailto:apzhai@tongji.edu.cn) (Jiwei Zhai), [liujinjun1@nbu.edu.cn](mailto:liujinjun1@nbu.edu.cn) (Jinjun Liu)

## Supporting Information 1

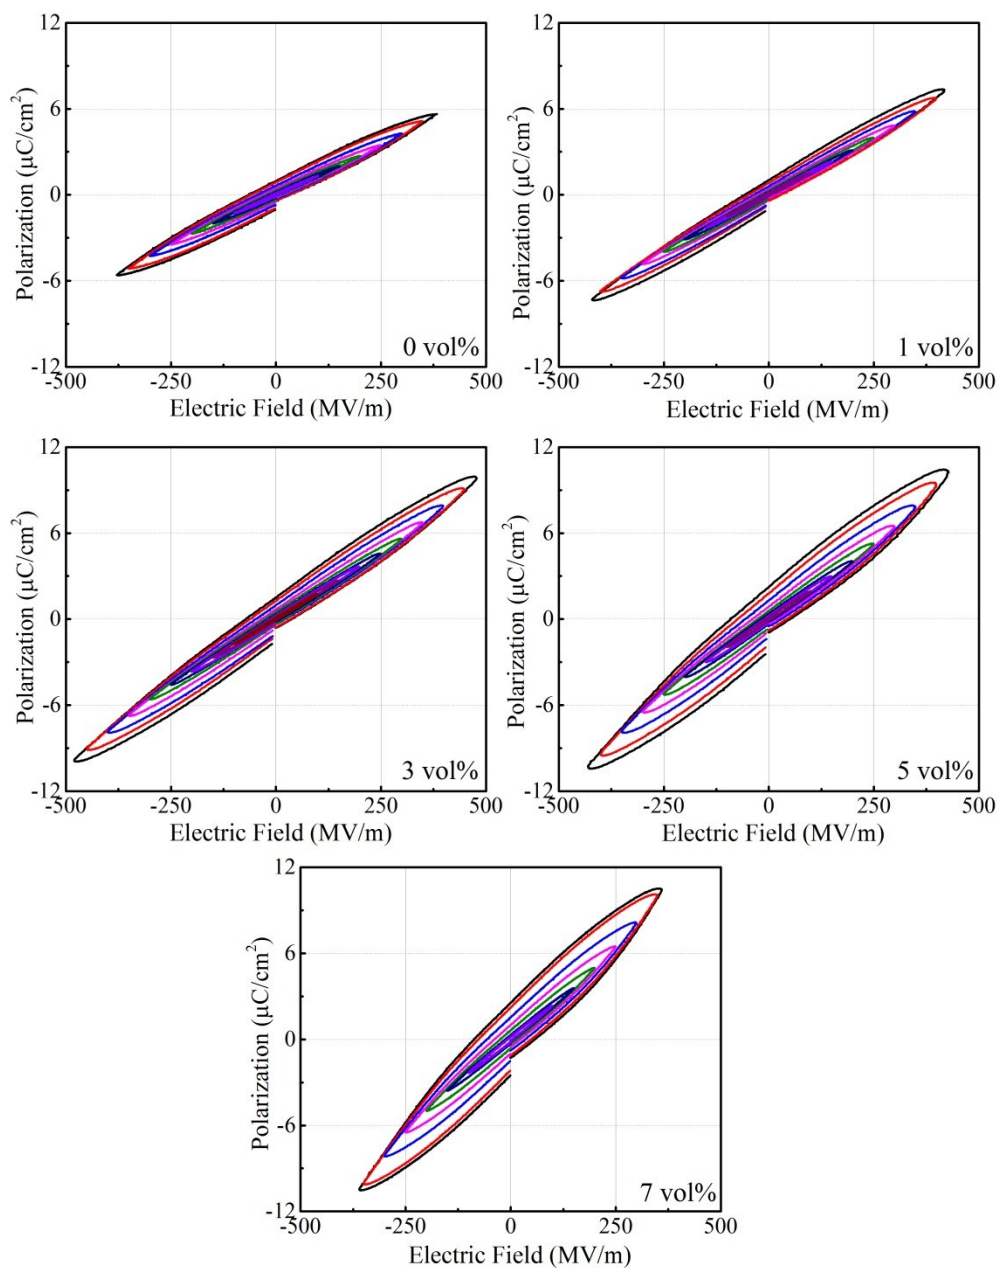

**Figure S1** P-E loops of pure PVDF-HFP and composite films with different 1D ABPA contents.

## Supporting Information 2

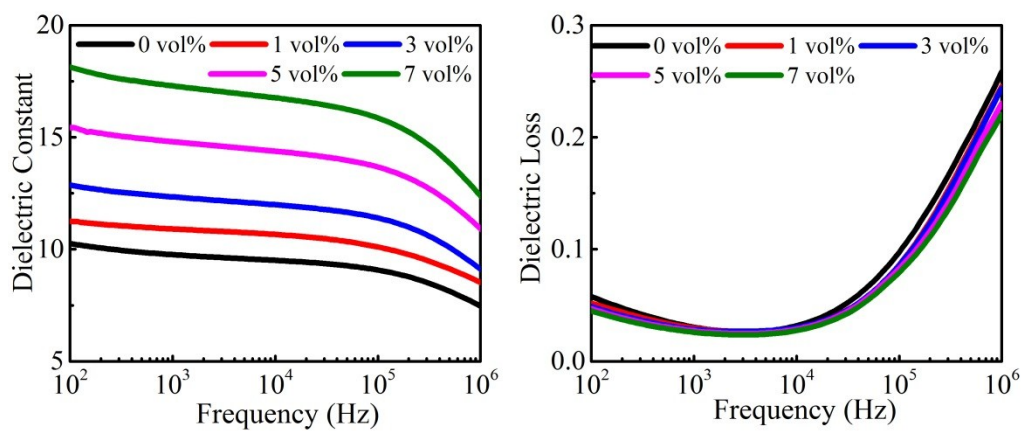

**Figure S2** Dielectric constant and dielectric loss dependence of frequency for pure PVDF-HFP and composite films with different 1D Bs contents.

### Supporting Information 3

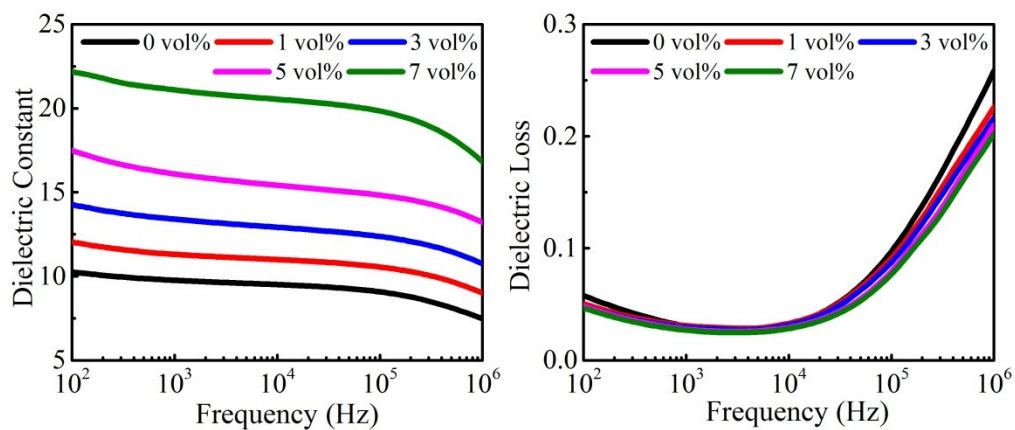

**Figure S3** Dielectric constant and dielectric loss dependence of frequency for pure PVDF-HFP and composite films with different 1D ABs contents.

#### Supporting Information 4

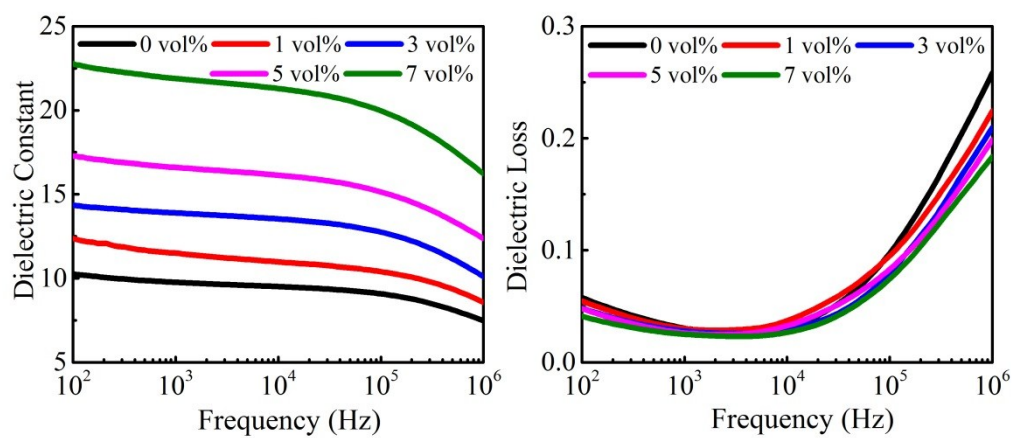

**Figure S4** Dielectric constant and dielectric loss dependence of frequency for pure PVDF-HFP and composite films with different 1D ABPs contents.

## Supporting Information 5

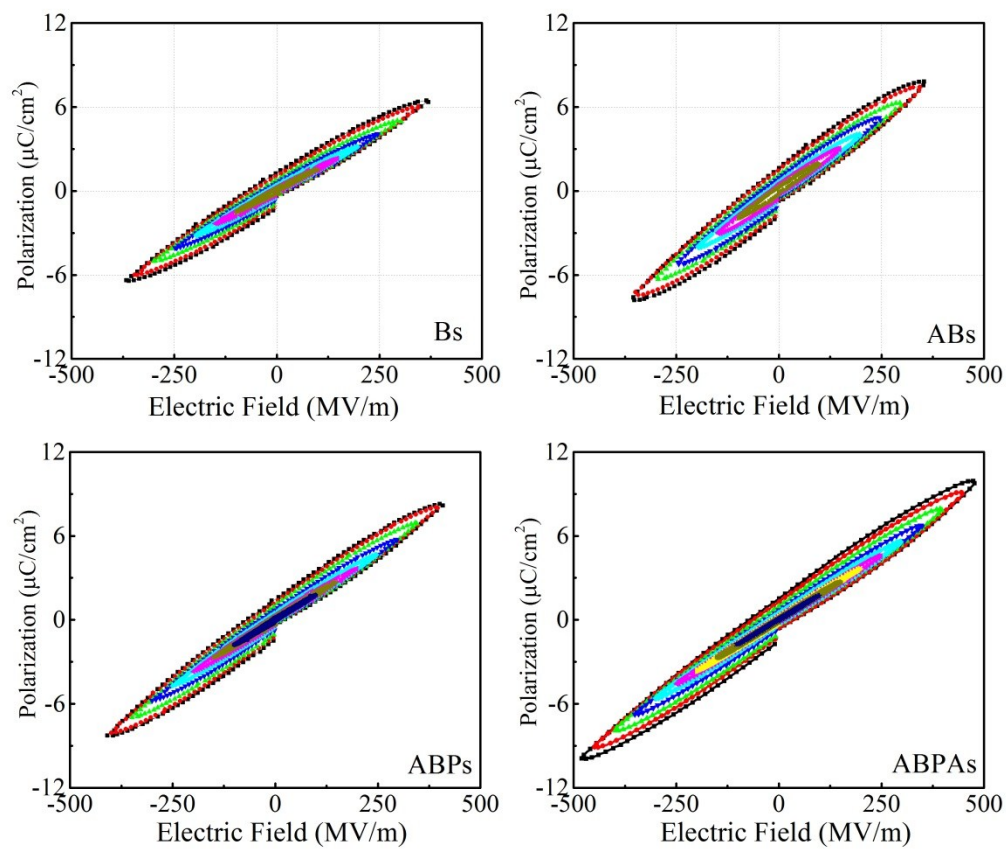

**Figure S5** P-E loops of composite films with different structure fillers of 1D Bs, 1D ABs, 1D ABPs, and 1D ABPAs.

## Supporting Information 6

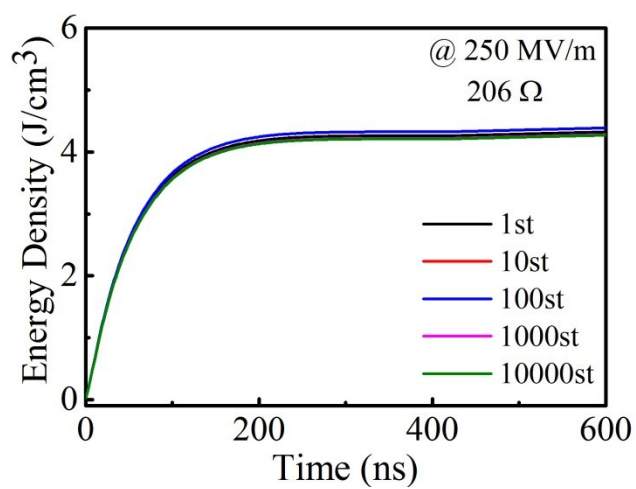

**Figure S6** Cycle performance of 1D ABPAs/P(VDF-HFP) composite films under 250 MV/m at room temperature.
